# Supplementary material
Source: Research Square preprint supplement (doi:10.21203/rs.3.rs-9565765/v1)
Supplement: Supplementary file 1 [file 53e0c76d5cc84bb93455731a.docx]

**Supplementary Tables**

**Supplementary Table 1. Quality-controlled protein panel.** Complete list of the 2,745 proteins retained after protein-level quality control.

**Supplementary Table 2. Excluded proteins.** Proteins removed before analysis because sample-level missingness exceeded the prespecified threshold.

**Supplementary Table 3. Expanded baseline characteristics.** Full version of Table 1 with all tabulated baseline variables used in the harmonized analysis dataset.

**Supplementary Tables 4-7. Full proteome-wide Cox results for each endpoint.** Hazard ratios, confidence intervals, P values, and Bonferroni status for broad VHD, mitral regurgitation, aortic stenosis, and aortic regurgitation.

**Supplementary Table 8. Pathway enrichment results.** Significantly enriched pathway terms derived from the Bonferroni-significant protein sets.

**Supplementary Table 9. cis-pQTL instrument summary.** Summary of the pQTL instruments used for the MR analyses.

**Supplementary Table 10. Full MR results.** Complete MR results for all tested protein-endpoint pairs.

**Supplementary Table 11. MR-significant proteins.** Bonferroni- and false-discovery-rate significant MR results for broad VHD and aortic stenosis.

**Supplementary Table 12. Colocalization status.** Diagnostic summary showing why formal colocalization was not implemented in the final manuscript because full regional exposure summary statistics were unavailable.

**Supplementary Table 13. Druggability annotation.** Curated druggability status for MR-prioritized proteins.

**Supplementary Table 14. Sex-stratified Cox results.** Full sex-specific proteome-wide association results.

**Supplementary Table 15. Protein-by-sex interaction tests.** Interaction coefficients, P values, and false discovery rate for the sex-interaction analysis.

**Supplementary Table 16. LASSO-selected features and weights.** Nonzero coefficients selected by the endpoint-specific LASSO models.

**Supplementary Table 17. Prediction model performance.** AUC, confidence intervals, DeLong comparison P values, detection rates, and retained feature counts for the clinical, protein-only, and combined models.
